# Supplementary material for: High-resolution drought simulations and comparison to soil moisture observations in Germany
Source: Copernicus journal article supplement (doi:10.5194/hess-2021-402), 2021-08-05
Supplement: Supplementary file [file hess-2021-402-AC1-supplement.pdf]

*Original reviewer comments are in italics, authors' response is in bold.*

---

**Referee #1:**

*SUMMARY:*

*A recommendation: moderate revision*

*Using observed SM data collected from 40 locations and in 4 different measurement methods in Germany, the authors evaluate the performance of second generation operational German Drought Monitor in simulating soil moisture (SM). Two major research questions within this paper have been adequately addressed and can be summarized as follows: 1. how well the GDM capture the SM dynamics; 2. will GDM with higher spatial resolution produce SM estimates with higher quality compared with the GDM of former edition. Through the research, it was found that 1. SM dynamics simulations could be moderately improved; 2. higher resolution drought information at the one-kilometer scale can be met.*

*This research is a report of the improvement in the model performance which is evaluated in the perspective of comparisons between the model simulations and the observations. The article conforms to the journal-specific instructions and is relevant to HESS. The work is appropriate to be published in this journal after some revisions. In the following part, I will state the major arguments in detail..*

**Authors' response #1: We thank the Reviewer for an overall positive assessments of our work. We paid detailed attention to all comments and have addressed all of them below accordingly.**

*The comparison between the observations and the model simulations are mainly indicated in the form of Spearman rank correlation coefficient. Nevertheless, the results of the comparison are in fact not so ideal in the perspective of solely the Spearman correlation coefficient, not to mention that significance values have been neglected when the observations and model results are compared. For example, when the observations from all the sites are included, the coefficients are normally lower. In addition, p-value has only been mentioned when both versions of the mHM and observations are compared (table 2). No mentioning of significance values also makes the comparison results not so validated. The significance value should be mentioned in the research to make results more reliable*

**Authors' response #2: Thank you for this comment. We agree with the reviewer that the significance value is the essential information. Therefore we will add the significance values into Figure 4 (see exemplary Figure R1 below) and Figure 5 by indicating locations with p-values < 0.05 and positive correlations.**

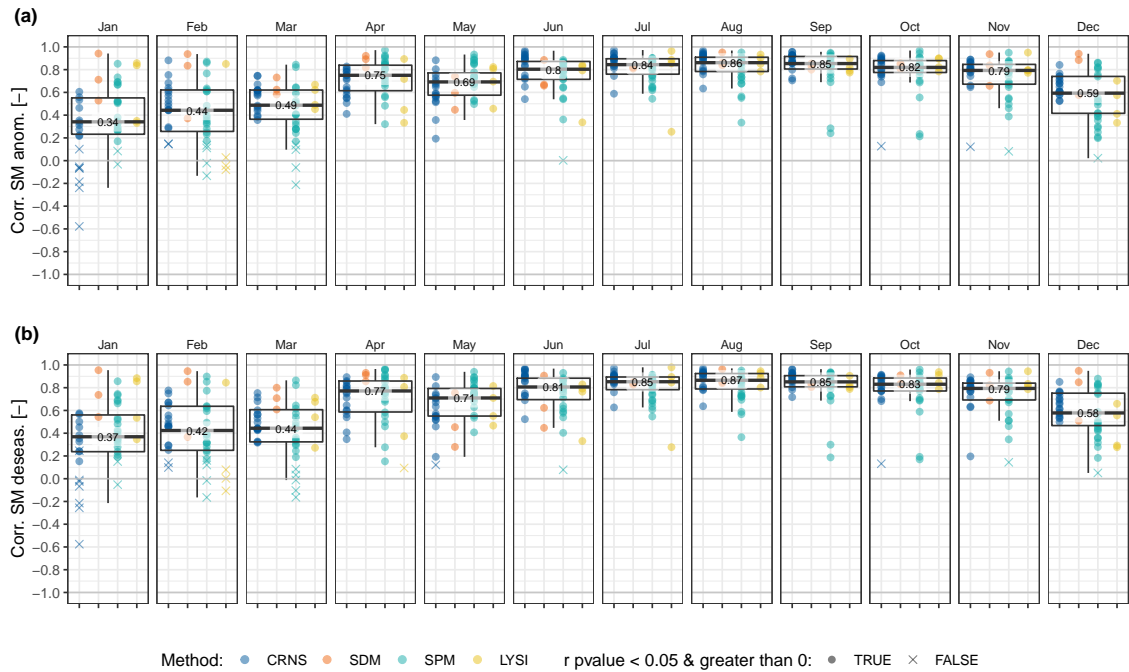

Figure R1: Same as Figure 4 in the main manuscript, but including information of correlation significance ( $p$ -value < 0.05) and positive correlation.

*In addition, the analyses are focused on the explanations for the correlation coefficients, few further knowledge regarding the inner uncertainty within the models such as misrepresentations or no involvement of certain natural factors are included to be accounted for the discrepancy between the observations and model results. In this way, the detailed explanations in the conclusion and discussion part of this paper are needed to clarify the differences between observations and model results.*

*The four kinds of observations seem not to be standardized. In this way, some values of correlation coefficient which concern a specific observation technique, are not guaranteed to be valid in indicating the performance of GDM in simulating SM dynamics. A standardization method should be carried out to ensure a consistent comparison between observations and model simulations.*

**Authors' response #3:** We thank the reviewer for the suggestions and agree that aspects regarding soil moisture measurements need to be considered carefully. Since there are differences between available soil moisture measurement techniques and to the spatial simulation scale, the approach of this paper was to include various measurement techniques in the model evaluation. Therefore, we believe that it is one of the strengths of the manuscript to show the comparison of mHM simulations to not only one type, but different soil moisture measurement techniques. As a consequence, differences that result from the measurement techniques are considered and discussed thoroughly in the manuscript.

The differences can be related e.g. to the site conditions, type of measurement devices and spatial or vertical scales that are represented. We were not completely sure to which of these differences the reviewer refers. Therefore, we aim to point out in the following how we addressed them in the main manuscript and how to improve it.

The SM sites are not homogeneously distributed over site conditions (e.g.

lysimeters are placed in grasslands). In general, it could be shown that the model performances do not systematically depend on site conditions that could result from different measurement techniques (see also answer #4). We suggest to move the Figure A2 to the section 3.1 to give it a more central focus.

Regarding the measurement devices, the single profile measurements (SPM), spatially distributed measurements (SDM) and lysimeters (LYSI) use either Time or Frequency Domain Reflectometry (TDR, FDR) sensors that do not expect differences in measurement quality. Cosmic Ray Neutron Sensing (CRNS) use a different measurements technique but were validated by spatially distributed measurements using TDR and FDR sensors (lines 200-204). As well, due to methodological reasons days with snow were discarded from analyses for CRNS as further explained in the method section in lines 200-204 and possible implications in lines 304-307.

The measurements represent different horizontal spatial scales, with the area represented being smallest for SPM and LYSI ( $\approx$  point scale), while SDM (resp. the corresponding mean) and CRNS represent much larger areas at  $0.1 \text{ km}^2$  (see lines 275-276). It was shown that SDM shows slightly better correlations to the simulations that support the closer scale match to the simulations (see e.g. 342-345). Those measurements are however still rare (see line 67) and since the paper focuses on SM dynamics the value of including SPM and LYSI measurements increases substantially. Additionally, CRNS data was excluded from the comparison in depth 25 - 60 cm due to its varying vertical penetration depth that does not allow a consistent depth-wise evaluation (see lines 325-236).

*In order to facilitate a better standardization, not only the differences in the methods of the observations, the observation sites' conditions should be considered in explaining the research results, such as the landuse, elevation, precipitation of different sites.*

**Authors' response #4:** We acknowledge the reviewers recommendations. In the main manuscript it is mentioned that the German-wide available information (soil maps, land use) is considered (lines 263-265). No available site-specific information is used in setting-up the hydrological model, e.g. precipitation is taken from daily available, interpolated DWD-observations and existing observations in the locations of soil moisture measurements are neglected. Hence, a different model setup would be required to meet the proposed standardization.

Correlations against sites' conditions (landuse as reported at the site, elevation and average precipitation from model) are plotted in the appendix of the main manuscript Figure A2 (see also Figure R2). As stated in the results section lines 285-286 "there is no general tendency for lower correlations at forest sites compared to crop and grassland sites (see Fig. A2)". Crop sites show slightly lower correlations than grassland sites, which is expected since anthropogenic activities (e.g., crop rotation) are not represented in mHM. Also, correlations show no clear tendency across the range of elevation and precipitation regimes.

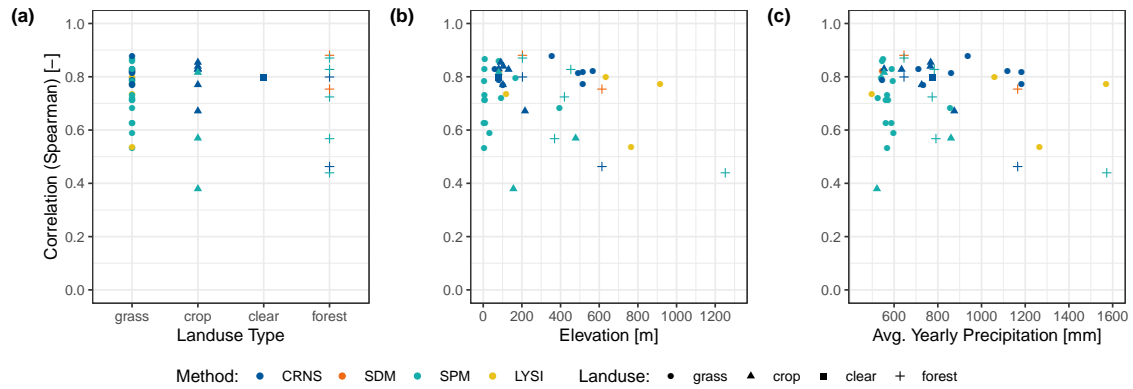

Figure R2: Same as Figure A2 in preprint manuscript.

*Additionally, the change of the landuse dataset and geology dataset in the two versions of the models has not been verified to have a positive effect on the simulation of soil moisture as the improvement in the second version of the model is not so evident (especially in spring and summer the change of Spearman rank correlation coefficient is negative). Further clarification for the effects of the model setting is needed in this research or in the future studies to be conducted by the authors' team.*

**Authors' response #5:** The increase of model resolution in the second version of the drought monitor was motivated both by the release of a new German-wide soil map [1] and increased user need to higher resolution simulations as extensively described in the main manuscript. This resulted in  $\approx 1.2 \times 1.2 \text{ km}^2$  model resolution in the GDM-v2-2021 setup as a compromise between scientific/model perspective (limited by data availability and process representation) and stakeholder/user perspective (see conclusion lines 438-441). Changes in landuse data and geology data (also the change of projection to WGS-84) in the new drought monitor version (GDM-v2-2021) on the other hand were driven by current efforts increasing the applicability and comparability of mHM to regions other than Germany and outside Europe. See also reviewer response #8 regarding the applicability of mHM outside of Germany. We acknowledge the critical remarks related with these changes but will point out in the following that the geology and landcover dataset changes have minor implications for SM drought simulations compared to the change in soil dataset. Currently, mHM takes relatively raw landuse classes. Species specific landcover is currently not accounted for. The difference in the resolution of GLOBCOVER and CORINE landuse dataset are in sub grid scale that influences the subgrid variability (GLOBCOVER resolution: 300 meters, CORINE  $< 100 \text{ m}$ ). Differences between the land cover datasets reduce if the land cover data is aggregated to the spatial resolution of the model. For example, at the spatial resolution of 1.2km, over 85 % of the grid cells both datasets agree on the dominant landcover. This shows that differences stem from differences at high spatial resolution and do not have a large impact on the simulation. We will include these aspects in the main manuscript to point out the limitations of the study. We propose to add the following sentence in the main manuscript in line 147: “The changes in landuse and geology dataset can influence the simu-

lations, yet play a minor role for the soil moisture simulations compared to the change in the soil dataset because changes of landuse data are in subgrid scale (resolution GLOBCOVER 300m, CORINE <100m) and no direct feedback of from saturated "groundwater" storage to soil moisture storage is implemented in mHM."

*Moreover, the limited length of observed soil moisture data (< 10 years for most locations) causes some uncertainty in the comparison between observations and model results in the whole. More observations are needed to facilitate a more reliable model evaluation using the observation datasets as the existing observations within this paper are only validated in representing some regions of the Germany.*

**Authors' response #6:** We compiled an unprecedented sample of soil moisture observations for hydrological model evaluation in Germany from different state-of-the-art measurement techniques and monitoring networks (FLUXNET and TERENO). We acknowledge the limitations of the length of observational data. In order to investigate the consequences of different time series lengths, Figure R3 shows correlation against length of time series. No trend of deteriorating correlations with length of time series can be detected. We agree on the need to further broaden the observational database for future comparisons of model simulations to observations.

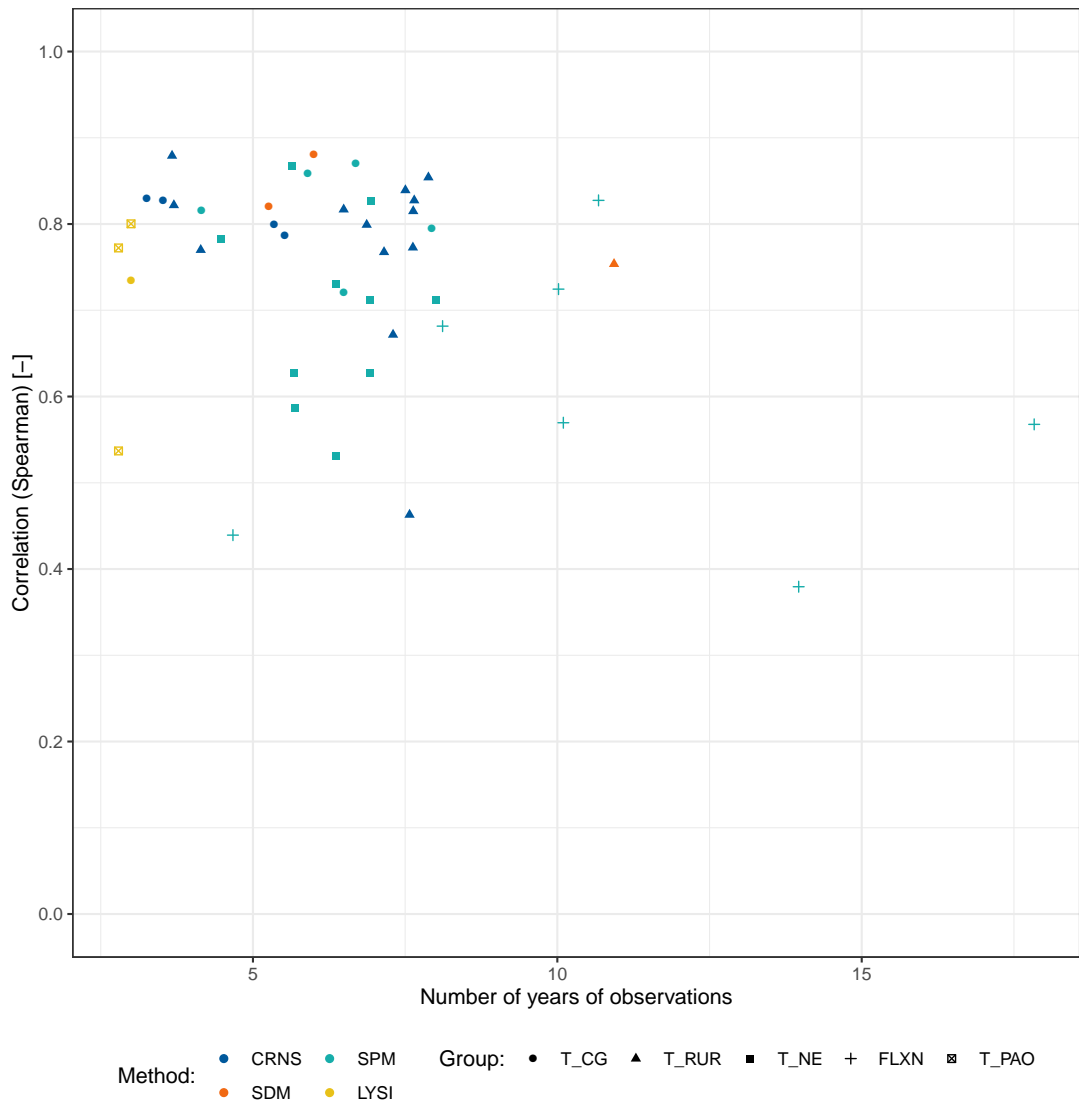

Figure R3: Correlations for the soil moisture observations against simulations (GDM-v2-2021 setup, 0-25cm depth) dependent of number of years of observations.

*The authors can try making better simulations of the water cycle including soil moisture, ground water, and precipitation, while a higher-quality observational soil moisture dataset is applied in the future study. Other methods to indicate the correlations between the observations and model results can be used and also other indices apart from SMI can be utilized in indicating the severity of soil moisture drought.*

**Authors' response #7: Thank you for your comment. We will include the recommendation in future studies.**

*Last but not least, it would be better to have some discussions on the applicability of the model to other regions other than Germany. Are there some future plans on extending the regional applicability of the model? Besides, some discussions on what can we learn from a small-scale modelling to improve large-scale modelling can be stated.*

**Authors' response #8: The applicability of the model to multiple scales and locations is a core element of mHM. The multiscale parameter regionalization (MPR) framework that is unique feature in mHM and now**

available as a standalone tool yields seamless model parameters at multiple scales and locations in an effective manner [13]. The effectiveness of MPR to transfer model parameters to scales and locations other than those used during calibration was demonstrated first in [10, 3]. The mHM was applied and evaluated in different climatological regions e.g. Europe [14, 7], West Africa [2], India [9] and US [4, 8]. [7] extensively evaluated mHM fluxes in Europe against evapotranspiration, soil moisture, runoff and total water storage (GRACE). [9] recently implemented a drought monitoring tool for South Asia based on mHM simulations and SMI. Global mHM simulations are currently conducted and evaluated within ULSYSES project <https://www.ufz.de/index.php?en=47367>.

*Some specific revisions regarding some parts of the manuscript are listed as follows:*

1. *The abstract is complete and correctly summarize the content of the paper, but it may need to be reduced a little to be more concise.*

**Authors' response #9:** We double checked that the abstract length meets the requirements of the journal. We could not identify potential for reducing the length without removing important information.

2. *The process of parameter calibration and optimization needs to be in more detail to facilitate a reproducibility in the future study.*

**Authors' response #10:** To improve reproducibility we suggest to extend the description of the calibration procedure with the following tables and suggest to put them in the supplements of the main manuscript.

- Table 1 showing the results of the 201 basins from the final selected parameter set.
- Table 2 showing the 200 sets of random multi-basin draws.

3. *Some of the conclusions are overstated. The explanation should be in more detail regarding these issues.*

(1) *Figure 3 shows the time series of both the observations and model simulations. It seems that the coefficient is much higher than those when all the sites were selected. How the sites are selected may need to be mentioned if there are other sites that contain both Cosmic Ray Neutron Sensing (CRNS) and Spatially Distributed Measurements (SDM).*

**Authors' response #11:** The sites have been selected because of the available time series length for different measurement methods. We propose to add relevant information regarding the selection to the manuscript by extending the caption of Figure 3 with the following sentence: "The Hordorf site also contains both CRNS and SDM measurements, but with much shorter time series length. For visualization the stations with longer time series were selected."

(2) *There is lower agreement between observations and simulations in winter.*

**Authors' response #12:** This is shown and discussed against other studies extensively in lines 289-302 of the main manuscript. The reasons lie in

the variable importance of hydrological processes in different seasons.

(3) *There is improvement of second version of the model in representing the upper soil but stagnation in representing the whole soil.*

**Authors' response #13:** We are not sure if we understand this comment correctly. Direct comparison of observed and simulated soil moisture is only possible for the upper soil due to observational data availability. For the total soil column, a comparison of drought intensities was performed showing similar results for both GDM versions. Assessing an improvement in soil moisture simulations between the GDM versions for the total soil column based on SM observations is not possible in the underlying study design.

(4) *The values of the Spearman rank correlation coefficient are not high enough to conclude a definite improvement of the first version of the mHM (Table 2).*

**Authors' response #14:** We clearly support this comment, but did not conclude a definite improvement. See line 397 in manuscript: „However, the overall improvements were relatively small, partly because the lower resolution model setup (4x4km grid cells) was already capturing the observed SM dynamics well.“

4. *In general, the authors have given proper credit to related work and clearly indicate their own original contribution. The references are appropriate to the research, but it would be better if some more papers are referenced especially those in which multibasin model calibrations and the SMI were applied.*

**Authors' response #15:** We have extended references with previous works focusing on the multi-basin calibrations, such as [5, 8, 6]. SMI was applied a.o. in [11, 12].

*The suggestions regarding some minor flaws and typos are described as follows:*

*Page 5, line 125: delete the “.However”.*

*Page 5, line 131: delete the “,” between “1.23” and “km”.*

*Page 6, line 138: move “that were used in the analysis” before “are located”.*

*Page 9, line 212, 213: remove “as”*

*Page 9, line 212, 213: add “,” before “including”, “the estimating”, and “is hampered”.*

*Page 11, line 270: remove “,” after the “both”.*

*Figure 3: add (a) to (l) for each sub panel to facilitate a better reference to the figures in the text when making the explanations.*

*Page 22: change the subtitle to “Conclusions and Discussions”.*

*Page 23, line 436: remove “that”.*

*Page 23, line 438: change “constitute” to “conclude”.*

*The research is sound and fundamental. Some language edits could be good for improving the paper's quality.*

**Authors' response #16:** We agree to the suggestions and will change accordingly.



## References

- [1] BGR. Digital soil map of Germany 1 : 200,000 (BUEK 200) v0.5, 2020.
- [2] M. Dembélé, N. Ceperley, S. J. Zwart, E. Salvadore, G. Mariethoz, and B. Schaeffli. Potential of satellite and reanalysis evaporation datasets for hydrological modelling under various model calibration strategies. *Advances in Water Resources*, 143:103667, Sept. 2020.
- [3] R. Kumar, L. Samaniego, and S. Attinger. Implications of distributed hydrologic model parameterization on water fluxes at multiple scales and locations: DISTRIBUTED HYDROLOGIC MODEL PARAMETERIZATIONS. *Water Resources Research*, 49(1):360–379, Jan. 2013.
- [4] B. Livneh, R. Kumar, and L. Samaniego. Influence of soil textural properties on hydrologic fluxes in the Mississippi river basin: Influence of Soil Textural Properties on Hydrologic Fluxes. *Hydrological Processes*, 29(21):4638–4655, Oct. 2015.
- [5] J. Mai, B. A. Tolson, H. Shen, [U+FFFD] Gaborit, V. Fortin, N. Gasset, H. Awoye, T. A. Stadnyk, L. M. Fry, E. A. Bradley, F. Seglenieks, A. G. T. Temgoua, D. G. Princz, S. Gharari, A. Haghnegahdar, M. E. Elshamy, S. Razavi, M. Gauch, J. Lin, X. Ni, Y. Yuan, M. McLeod, N. B. Basu, R. Kumar, O. Rakovec, L. Samaniego, S. Attinger, N. K. Shrestha, P. Daggupati, T. Roy, S. Wi, T. Hunter, J. R. Craig, and A. Pietroniro. Great Lakes Runoff Intercomparison Project Phase 3: Lake Erie (GRIP-E). *Journal of Hydrologic Engineering*, 26(9):05021020, Sept. 2021.
- [6] N. Mizukami, M. P. Clark, A. J. Newman, A. W. Wood, E. D. Gutmann, B. Nijssen, O. Rakovec, and L. Samaniego. Towards seamless large-domain parameter estimation for hydrologic models: LARGE-DOMAIN MODEL PARAMETERS. *Water Resources Research*, 53(9):8020–8040, Sept. 2017.
- [7] O. Rakovec, R. Kumar, J. Mai, M. Cuntz, S. Thober, M. Zink, S. Attinger, D. Schäfer, M. Schrön, and L. Samaniego. Multiscale and Multivariate Evaluation of Water Fluxes and States over European River Basins. *Journal of Hydrometeorology*, 2016.
- [8] O. Rakovec, N. Mizukami, R. Kumar, A. J. Newman, S. Thober, A. W. Wood, M. P. Clark, and L. Samaniego. Diagnostic Evaluation of Large[U+2010]Domain Hydrologic Models Calibrated Across the Contiguous United States. *Journal of Geophysical Research: Atmospheres*, 124(24):13991–14007, Dec. 2019.
- [9] T. R. Saha, P. K. Shrestha, O. Rakovec, S. Thober, and L. Samaniego. A drought monitoring tool for South Asia. *Environmental Research Letters*, 16(5):054014, May 2021.
- [10] L. Samaniego, R. Kumar, and S. Attinger. Multiscale parameter regionalization of a grid-based hydrologic model at the mesoscale: MULTISCALE PARAMETER REGIONALIZATION. *Water Resources Research*, 46(5), May 2010.
- [11] L. Samaniego, R. Kumar, and M. Zink. Implications of parameter uncertainty on soil moisture drought analysis in Germany. *Journal of Hydrometeorology*, 14(1):47–68, 2013. ISBN: 1525-755X.

- [12] L. Samaniego, S. Thober, R. Kumar, N. Wanders, O. Rakovec, M. Pan, M. Zink, J. Sheffield, E. F. Wood, and A. Marx. Anthropogenic warming exacerbates European soil moisture droughts. *Nature Climate Change*, 8(5):421–426, May 2018.
- [13] R. Schweppe, S. Thober, S. Müller, M. Kelbling, R. Kumar, S. Attinger, and L. Samaniego. MPR 1.0: a stand-alone multiscale parameter regionalization tool for improved parameter estimation of land surface models. *Geoscientific Model Development*, 15(2):859–882, Jan. 2022.
- [14] S. Thober, R. Kumar, J. Sheffield, J. Mai, D. Schäfer, and L. Samaniego. Seasonal Soil Moisture Drought Prediction over Europe Using the North American Multi-Model Ensemble (NMME). *Journal of Hydrometeorology*, 16(6):2329–2344, Dec. 2015.

# Appendix

Table 1: Calibration results of the final selected best mHM parameter set for the 201 basins in Germany. Daily and monthly NSE and KGE metrics are shown as well as their three components r (correlation), alpha (bias) and beta (variability). The best calibration parameter set was selected based on the median of daily KGE over all 201 catchments. The IDs are GRDC

| num | ID      | nse<br>mon | kge<br>mon | r mon | alpha<br>mon | beta<br>mon | nse day | kge day | r day | alpha<br>day | beta<br>day |
|-----|---------|------------|------------|-------|--------------|-------------|---------|---------|-------|--------------|-------------|
| 1   | 6337200 | 0.938      | 0.942      | 0.972 | 1.050        | 1.010       | 0.795   | 0.816   | 0.924 | 1.167        | 1.010       |
| 2   | 6335304 | 0.925      | 0.847      | 0.979 | 1.139        | 1.060       | 0.836   | 0.786   | 0.950 | 1.200        | 1.061       |
| 3   | 6337515 | 0.931      | 0.913      | 0.971 | 1.080        | 1.019       | 0.790   | 0.780   | 0.931 | 1.208        | 1.019       |
| 4   | 6335240 | 0.936      | 0.900      | 0.975 | 1.090        | 1.035       | 0.825   | 0.819   | 0.937 | 1.166        | 1.035       |
| 5   | 6337517 | 0.923      | 0.896      | 0.970 | 1.091        | 1.039       | 0.801   | 0.785   | 0.935 | 1.201        | 1.039       |
| 6   | 6337518 | 0.932      | 0.933      | 0.970 | 1.056        | 1.019       | 0.831   | 0.831   | 0.938 | 1.156        | 1.020       |
| 7   | 6335302 | 0.925      | 0.857      | 0.977 | 1.130        | 1.055       | 0.783   | 0.787   | 0.926 | 1.192        | 1.056       |
| 8   | 6337100 | 0.937      | 0.951      | 0.971 | 1.039        | 1.004       | 0.822   | 0.845   | 0.930 | 1.139        | 1.004       |
| 9   | 6337514 | 0.936      | 0.922      | 0.973 | 1.073        | 1.004       | 0.805   | 0.823   | 0.927 | 1.161        | 1.004       |
| 10  | 6337516 | 0.953      | 0.951      | 0.978 | 1.044        | 0.996       | 0.850   | 0.875   | 0.938 | 1.109        | 0.996       |
| 11  | 6337250 | 0.900      | 0.883      | 0.961 | 1.100        | 1.047       | 0.647   | 0.741   | 0.878 | 1.224        | 1.048       |
| 12  | 6335500 | 0.942      | 0.919      | 0.978 | 1.046        | 0.937       | 0.768   | 0.832   | 0.906 | 1.125        | 0.937       |
| 13  | 6337519 | 0.957      | 0.963      | 0.980 | 1.025        | 0.981       | 0.845   | 0.885   | 0.933 | 1.092        | 0.981       |
| 14  | 6335301 | 0.952      | 0.927      | 0.981 | 1.054        | 0.955       | 0.791   | 0.846   | 0.914 | 1.120        | 0.955       |
| 15  | 6335600 | 0.949      | 0.917      | 0.979 | 1.078        | 1.018       | 0.908   | 0.932   | 0.958 | 1.049        | 1.019       |
| 16  | 6337400 | 0.957      | 0.972      | 0.979 | 0.996        | 0.983       | 0.847   | 0.909   | 0.929 | 1.054        | 0.983       |
| 17  | 6335303 | 0.947      | 0.895      | 0.982 | 1.093        | 0.954       | 0.767   | 0.824   | 0.908 | 1.143        | 0.954       |
| 18  | 6338140 | 0.977      | 0.964      | 0.989 | 0.978        | 0.973       | 0.923   | 0.933   | 0.961 | 0.953        | 0.972       |
| 19  | 6338100 | 0.969      | 0.927      | 0.988 | 0.958        | 0.942       | 0.914   | 0.906   | 0.958 | 0.939        | 0.942       |
| 20  | 6335601 | 0.931      | 0.911      | 0.973 | 1.064        | 1.056       | 0.891   | 0.895   | 0.954 | 1.076        | 1.056       |
| 21  | 6337501 | 0.870      | 0.787      | 0.966 | 1.195        | 1.078       | 0.735   | 0.745   | 0.916 | 1.228        | 1.078       |
| 22  | 6335530 | 0.762      | 0.635      | 0.962 | 1.362        | 0.976       | 0.558   | 0.588   | 0.899 | 1.399        | 0.975       |
| 23  | 6337510 | 0.877      | 0.919      | 0.942 | 1.014        | 1.054       | 0.614   | 0.751   | 0.856 | 1.195        | 1.055       |
| 24  | 6337507 | 0.934      | 0.922      | 0.972 | 1.069        | 1.023       | 0.768   | 0.863   | 0.897 | 1.087        | 1.023       |
| 25  | 6340200 | 0.757      | 0.809      | 0.910 | 1.143        | 1.089       | 0.144   | 0.482   | 0.785 | 1.462        | 1.090       |
| 26  | 6337513 | 0.935      | 0.966      | 0.968 | 1.010        | 1.004       | 0.788   | 0.853   | 0.911 | 1.118        | 1.004       |
| 27  | 6337509 | 0.885      | 0.912      | 0.948 | 1.012        | 1.070       | 0.675   | 0.757   | 0.884 | 1.201        | 1.071       |
| 28  | 6337511 | 0.933      | 0.939      | 0.970 | 1.025        | 1.047       | 0.766   | 0.813   | 0.911 | 1.158        | 1.047       |
| 29  | 6338110 | 0.957      | 0.866      | 0.987 | 0.881        | 0.940       | 0.888   | 0.822   | 0.951 | 0.840        | 0.940       |
| 30  | 6337502 | 0.921      | 0.867      | 0.979 | 1.015        | 0.870       | 0.795   | 0.826   | 0.921 | 1.085        | 0.870       |
| 31  | 6337512 | 0.939      | 0.958      | 0.969 | 0.977        | 1.016       | 0.764   | 0.856   | 0.897 | 1.099        | 1.017       |
| 32  | 6335800 | 0.929      | 0.802      | 0.982 | 0.819        | 0.923       | 0.771   | 0.791   | 0.881 | 0.846        | 0.924       |
| 33  | 6335083 | 0.852      | 0.759      | 0.973 | 1.087        | 1.223       | 0.824   | 0.749   | 0.945 | 1.100        | 1.224       |
| 34  | 6335030 | 0.950      | 0.900      | 0.983 | 1.017        | 1.097       | 0.851   | 0.874   | 0.933 | 1.047        | 1.096       |
| 35  | 6342502 | 0.676      | 0.728      | 0.927 | 1.163        | 1.205       | 0.138   | 0.468   | 0.798 | 1.448        | 1.206       |
| 36  | 6335115 | 0.948      | 0.902      | 0.977 | 0.941        | 1.075       | 0.855   | 0.797   | 0.932 | 0.825        | 1.076       |
| 37  | 6335602 | 0.911      | 0.870      | 0.964 | 0.897        | 0.929       | 0.893   | 0.891   | 0.948 | 0.935        | 0.930       |
| 38  | 6338130 | 0.905      | 0.735      | 0.988 | 0.770        | 0.869       | 0.825   | 0.683   | 0.944 | 0.717        | 0.869       |
| 39  | 6335350 | 0.964      | 0.899      | 0.986 | 0.902        | 0.982       | 0.865   | 0.803   | 0.938 | 0.814        | 0.982       |
| 40  | 6340700 | 0.818      | 0.847      | 0.928 | 1.127        | 0.956       | 0.737   | 0.794   | 0.903 | 1.176        | 0.958       |
| 41  | 6337506 | 0.967      | 0.969      | 0.983 | 0.975        | 0.992       | 0.807   | 0.852   | 0.899 | 0.892        | 0.992       |
| 42  | 6338160 | 0.943      | 0.859      | 0.984 | 1.135        | 0.965       | 0.879   | 0.852   | 0.956 | 1.137        | 0.964       |
| 43  | 6337500 | 0.851      | 0.825      | 0.929 | 0.861        | 1.080       | 0.722   | 0.809   | 0.854 | 0.907        | 1.080       |
| 44  | 6338120 | 0.900      | 0.774      | 0.972 | 0.800        | 0.900       | 0.763   | 0.652   | 0.906 | 0.681        | 0.899       |
| 45  | 6335045 | 0.981      | 0.949      | 0.992 | 0.958        | 1.027       | 0.873   | 0.871   | 0.936 | 0.892        | 1.027       |
| 46  | 6335116 | 0.962      | 0.952      | 0.982 | 0.978        | 1.038       | 0.873   | 0.838   | 0.939 | 0.855        | 1.038       |
| 47  | 6342970 | 0.691      | 0.755      | 0.888 | 0.966        | 1.215       | 0.460   | 0.660   | 0.804 | 1.174        | 1.216       |
| 48  | 6337508 | 0.974      | 0.965      | 0.987 | 0.969        | 0.988       | 0.843   | 0.866   | 0.919 | 0.894        | 0.988       |
| 49  | 6342521 | 0.817      | 0.833      | 0.934 | 1.098        | 1.118       | 0.292   | 0.557   | 0.803 | 1.378        | 1.119       |
| 50  | 6338161 | 0.969      | 0.928      | 0.989 | 1.046        | 0.946       | 0.925   | 0.931   | 0.966 | 1.025        | 0.946       |
| 51  | 6335081 | 0.907      | 0.940      | 0.956 | 1.029        | 0.973       | 0.696   | 0.761   | 0.894 | 1.212        | 0.973       |
| 52  | 6335031 | 0.849      | 0.755      | 0.970 | 1.094        | 1.225       | 0.788   | 0.724   | 0.934 | 1.146        | 1.225       |
| 53  | 6335290 | 0.937      | 0.825      | 0.982 | 0.838        | 0.936       | 0.824   | 0.713   | 0.931 | 0.729        | 0.936       |
| 54  | 6335681 | 0.946      | 0.943      | 0.975 | 1.000        | 1.051       | 0.844   | 0.905   | 0.922 | 0.985        | 1.052       |
| 55  | 6335351 | 0.960      | 0.910      | 0.983 | 0.913        | 0.982       | 0.871   | 0.803   | 0.942 | 0.813        | 0.981       |
| 56  | 6335520 | 0.775      | 0.789      | 0.923 | 1.151        | 1.125       | 0.726   | 0.782   | 0.894 | 1.142        | 1.126       |
| 57  | 6342130 | 0.915      | 0.796      | 0.973 | 0.803        | 0.955       | 0.757   | 0.730   | 0.878 | 0.764        | 0.956       |
| 58  | 6338150 | 0.953      | 0.948      | 0.978 | 0.972        | 0.962       | 0.839   | 0.813   | 0.921 | 0.835        | 0.962       |
| 59  | 6335660 | 0.854      | 0.788      | 0.964 | 1.165        | 1.128       | 0.722   | 0.684   | 0.928 | 1.279        | 1.129       |
| 60  | 6335046 | 0.968      | 0.901      | 0.988 | 0.906        | 0.969       | 0.850   | 0.822   | 0.926 | 0.842        | 0.969       |
| 61  | 6337505 | 0.641      | 0.817      | 0.837 | 1.082        | 0.989       | 0.031   | 0.564   | 0.603 | 1.179        | 0.989       |
| 62  | 6340050 | -0.892     | -0.287     | 0.949 | 2.286        | 0.979       | -0.440  | -0.008  | 0.892 | 2.002        | 0.977       |
| 63  | 6341500 | 0.459      | 0.587      | 0.918 | 0.863        | 0.619       | 0.413   | 0.581   | 0.856 | 0.903        | 0.619       |
| 64  | 6342520 | 0.880      | 0.863      | 0.941 | 0.882        | 0.963       | 0.468   | 0.742   | 0.752 | 1.062        | 0.963       |
| 65  | 6340365 | 0.701      | 0.808      | 0.885 | 1.107        | 0.891       | 0.563   | 0.761   | 0.815 | 1.104        | 0.891       |

|     |         |        |        |        |       |       |        |        |        |       |       |
|-----|---------|--------|--------|--------|-------|-------|--------|--------|--------|-------|-------|
| 66  | 6337050 | 0.945  | 0.880  | 0.982  | 1.106 | 1.055 | 0.905  | 0.876  | 0.964  | 1.105 | 1.055 |
| 67  | 6337504 | 0.936  | 0.800  | 0.985  | 0.801 | 0.999 | 0.829  | 0.776  | 0.920  | 0.791 | 0.999 |
| 68  | 6337610 | 0.940  | 0.914  | 0.971  | 0.920 | 0.993 | 0.772  | 0.884  | 0.891  | 1.037 | 0.993 |
| 69  | 6335160 | 0.862  | 0.760  | 0.976  | 1.141 | 1.193 | 0.828  | 0.751  | 0.949  | 1.147 | 1.194 |
| 70  | 6335082 | 0.698  | 0.721  | 0.922  | 1.193 | 1.186 | 0.315  | 0.465  | 0.866  | 1.483 | 1.186 |
| 71  | 6337550 | 0.909  | 0.817  | 0.967  | 0.854 | 0.894 | 0.806  | 0.710  | 0.919  | 0.742 | 0.894 |
| 72  | 6335521 | 0.883  | 0.864  | 0.942  | 0.878 | 1.019 | 0.802  | 0.801  | 0.899  | 0.830 | 1.021 |
| 73  | 6337601 | 0.949  | 0.940  | 0.977  | 0.988 | 0.946 | 0.887  | 0.874  | 0.944  | 0.900 | 0.946 |
| 74  | 6342522 | 0.881  | 0.813  | 0.953  | 0.877 | 1.133 | 0.623  | 0.756  | 0.806  | 0.935 | 1.134 |
| 75  | 6337060 | 0.879  | 0.857  | 0.961  | 0.983 | 0.864 | 0.789  | 0.778  | 0.904  | 0.854 | 0.863 |
| 76  | 6335125 | 0.922  | 0.893  | 0.967  | 0.940 | 1.082 | 0.867  | 0.886  | 0.934  | 0.958 | 1.083 |
| 77  | 6342110 | 0.512  | 0.440  | 0.946  | 1.556 | 1.038 | 0.315  | 0.344  | 0.922  | 1.650 | 1.038 |
| 78  | 6335310 | 0.961  | 0.942  | 0.983  | 1.041 | 1.038 | 0.751  | 0.861  | 0.887  | 1.072 | 1.038 |
| 79  | 6340320 | 0.850  | 0.914  | 0.925  | 0.978 | 1.035 | 0.508  | 0.725  | 0.811  | 1.197 | 1.036 |
| 80  | 6337570 | 0.932  | 0.912  | 0.972  | 1.078 | 0.972 | 0.837  | 0.914  | 0.919  | 1.002 | 0.972 |
| 81  | 6335048 | 0.967  | 0.891  | 0.991  | 1.093 | 1.056 | 0.886  | 0.918  | 0.946  | 1.027 | 1.055 |
| 82  | 6335460 | 0.918  | 0.952  | 0.961  | 1.021 | 1.018 | 0.856  | 0.880  | 0.926  | 0.908 | 1.019 |
| 83  | 6342980 | 0.920  | 0.840  | 0.968  | 0.846 | 0.970 | 0.832  | 0.883  | 0.913  | 0.928 | 0.971 |
| 84  | 6357020 | -0.979 | 0.370  | 0.837  | 0.894 | 0.401 | -0.841 | 0.364  | 0.795  | 0.951 | 0.400 |
| 85  | 6335291 | 0.916  | 0.785  | 0.976  | 0.792 | 0.951 | 0.824  | 0.724  | 0.928  | 0.738 | 0.951 |
| 86  | 6342670 | 0.653  | 0.655  | 0.943  | 1.286 | 1.185 | 0.632  | 0.747  | 0.828  | 0.989 | 1.185 |
| 87  | 6336930 | 0.971  | 0.970  | 0.986  | 1.012 | 1.023 | 0.908  | 0.935  | 0.953  | 0.961 | 1.023 |
| 88  | 6335540 | 0.911  | 0.793  | 0.971  | 0.799 | 1.038 | 0.828  | 0.811  | 0.914  | 0.837 | 1.038 |
| 89  | 6335670 | 0.726  | 0.620  | 0.969  | 1.265 | 1.271 | 0.557  | 0.504  | 0.922  | 1.408 | 1.271 |
| 90  | 6335695 | 0.920  | 0.879  | 0.963  | 0.887 | 1.020 | 0.873  | 0.871  | 0.935  | 0.891 | 1.021 |
| 91  | 6335076 | 0.965  | 0.934  | 0.985  | 0.988 | 1.063 | 0.859  | 0.847  | 0.929  | 0.880 | 1.063 |
| 92  | 6335360 | 0.967  | 0.875  | 0.990  | 0.876 | 1.013 | 0.890  | 0.836  | 0.949  | 0.844 | 1.013 |
| 93  | 6335450 | 0.906  | 0.858  | 0.957  | 0.868 | 0.968 | 0.844  | 0.841  | 0.921  | 0.866 | 0.969 |
| 94  | 6340810 | -1.298 | 0.423  | 0.717  | 1.038 | 0.499 | -0.560 | 0.436  | 0.744  | 0.978 | 0.498 |
| 95  | 6340070 | 0.410  | 0.367  | 0.963  | 1.590 | 1.227 | 0.372  | 0.368  | 0.940  | 1.587 | 1.227 |
| 96  | 6338250 | 0.896  | 0.880  | 0.956  | 0.937 | 0.908 | 0.788  | 0.757  | 0.899  | 0.800 | 0.907 |
| 97  | 6335510 | 0.054  | 0.385  | 0.830  | 1.525 | 1.273 | -0.368 | 0.140  | 0.824  | 1.796 | 1.273 |
| 98  | 6335690 | 0.937  | 0.895  | 0.979  | 1.076 | 1.069 | 0.802  | 0.807  | 0.898  | 0.851 | 1.068 |
| 99  | 6337530 | 0.967  | 0.911  | 0.986  | 0.918 | 0.967 | 0.864  | 0.817  | 0.936  | 0.832 | 0.967 |
| 100 | 6337560 | 0.783  | 0.795  | 0.888  | 0.842 | 0.932 | 0.672  | 0.684  | 0.824  | 0.746 | 0.932 |
| 101 | 6335675 | 0.905  | 0.893  | 0.964  | 1.063 | 1.078 | 0.702  | 0.715  | 0.843  | 0.776 | 1.079 |
| 102 | 6342120 | -0.134 | 0.066  | 0.942  | 1.929 | 1.073 | 0.273  | 0.420  | 0.872  | 1.560 | 1.074 |
| 103 | 6337520 | 0.930  | 0.809  | 0.979  | 0.814 | 0.963 | 0.803  | 0.789  | 0.900  | 0.818 | 0.962 |
| 104 | 6338800 | 0.927  | 0.945  | 0.966  | 1.023 | 0.964 | 0.882  | 0.929  | 0.941  | 0.984 | 0.964 |
| 105 | 6335710 | 0.929  | 0.917  | 0.969  | 0.968 | 1.070 | 0.822  | 0.887  | 0.912  | 0.991 | 1.070 |
| 106 | 6335603 | 0.919  | 0.820  | 0.971  | 0.827 | 0.959 | 0.783  | 0.697  | 0.906  | 0.714 | 0.960 |
| 107 | 6342070 | 0.497  | 0.756  | 0.763  | 1.054 | 1.020 | -0.000 | 0.519  | 0.679  | 1.357 | 1.021 |
| 108 | 6335032 | 0.927  | 0.942  | 0.966  | 1.043 | 1.019 | 0.727  | 0.839  | 0.882  | 1.108 | 1.019 |
| 109 | 6337410 | 0.924  | 0.872  | 0.969  | 0.903 | 0.921 | 0.780  | 0.710  | 0.900  | 0.740 | 0.921 |
| 110 | 6335650 | 0.702  | 0.712  | 0.919  | 1.263 | 1.087 | 0.620  | 0.711  | 0.876  | 1.245 | 1.088 |
| 111 | 6340218 | -2.784 | -0.761 | 0.922  | 2.755 | 0.878 | -1.504 | -0.268 | 0.824  | 2.250 | 0.877 |
| 112 | 6342640 | 0.532  | 0.507  | 0.924  | 1.485 | 1.047 | 0.472  | 0.722  | 0.790  | 1.176 | 1.047 |
| 113 | 6342100 | 0.337  | 0.445  | 0.887  | 1.541 | 0.953 | 0.524  | 0.654  | 0.858  | 1.312 | 0.954 |
| 114 | 6342655 | -0.166 | 0.287  | 0.893  | 1.651 | 1.272 | 0.423  | 0.611  | 0.815  | 1.207 | 1.272 |
| 115 | 6335167 | 0.329  | 0.362  | 0.969  | 1.560 | 1.304 | 0.397  | 0.417  | 0.923  | 1.492 | 1.303 |
| 116 | 6340220 | 0.369  | 0.507  | 0.776  | 1.042 | 1.437 | 0.339  | 0.480  | 0.765  | 1.151 | 1.438 |
| 117 | 6335075 | 0.784  | 0.739  | 0.940  | 1.254 | 0.986 | 0.632  | 0.793  | 0.847  | 1.139 | 0.984 |
| 118 | 6340335 | -3.081 | -0.289 | 0.340  | 1.755 | 1.811 | -2.381 | -0.162 | 0.168  | 1.638 | 1.501 |
| 119 | 6335810 | 0.938  | 0.873  | 0.975  | 0.898 | 1.071 | 0.786  | 0.734  | 0.898  | 0.765 | 1.071 |
| 120 | 6335565 | 0.834  | 0.782  | 0.931  | 0.832 | 1.120 | 0.736  | 0.655  | 0.880  | 0.700 | 1.120 |
| 121 | 6338163 | 0.917  | 0.889  | 0.970  | 1.081 | 0.930 | 0.819  | 0.888  | 0.914  | 1.019 | 0.930 |
| 122 | 6337340 | 0.899  | 0.929  | 0.951  | 0.982 | 1.048 | 0.699  | 0.805  | 0.879  | 1.144 | 1.048 |
| 123 | 6340210 | 0.921  | 0.957  | 0.962  | 1.017 | 1.011 | 0.839  | 0.850  | 0.917  | 0.876 | 1.010 |
| 124 | 6337541 | 0.891  | 0.940  | 0.945  | 0.988 | 0.977 | 0.814  | 0.903  | 0.910  | 1.030 | 0.977 |
| 125 | 6335117 | 0.766  | 0.759  | 0.914  | 0.912 | 0.793 | 0.713  | 0.697  | 0.867  | 0.824 | 0.793 |
| 126 | 6342675 | 0.612  | 0.667  | 0.919  | 1.271 | 1.175 | 0.588  | 0.670  | 0.779  | 0.828 | 1.175 |
| 127 | 6340350 | 0.716  | 0.674  | 0.935  | 1.141 | 1.287 | 0.624  | 0.667  | 0.862  | 1.095 | 1.288 |
| 128 | 6335190 | -1.020 | -0.127 | 0.839  | 2.103 | 1.164 | -1.454 | -0.252 | 0.810  | 2.227 | 1.162 |
| 129 | 6342230 | 0.082  | 0.439  | 0.934  | 1.417 | 1.369 | 0.021  | 0.252  | 0.896  | 1.642 | 1.370 |
| 130 | 6337310 | 0.914  | 0.844  | 0.966  | 0.888 | 1.103 | 0.852  | 0.812  | 0.929  | 0.860 | 1.103 |
| 131 | 6340315 | 0.889  | 0.826  | 0.959  | 0.986 | 1.168 | 0.782  | 0.800  | 0.903  | 1.044 | 1.169 |
| 132 | 6335621 | -1.611 | -0.208 | -0.203 | 1.075 | 1.090 | -1.398 | -0.084 | -0.075 | 1.107 | 1.088 |
| 133 | 6340440 | 0.879  | 0.861  | 0.959  | 1.085 | 0.898 | 0.768  | 0.813  | 0.882  | 0.897 | 0.897 |
| 134 | 6340360 | 0.764  | 0.644  | 0.911  | 0.658 | 1.042 | 0.672  | 0.617  | 0.841  | 0.654 | 1.044 |
| 135 | 6340366 | 0.868  | 0.838  | 0.946  | 0.892 | 0.893 | 0.647  | 0.612  | 0.822  | 0.672 | 0.892 |
| 136 | 6337542 | 0.845  | 0.826  | 0.941  | 0.912 | 0.862 | 0.808  | 0.835  | 0.913  | 0.973 | 0.862 |
| 137 | 6335470 | 0.663  | 0.641  | 0.950  | 1.323 | 1.150 | 0.694  | 0.712  | 0.914  | 1.230 | 1.151 |
| 138 | 6336510 | 0.881  | 0.743  | 0.982  | 1.107 | 1.233 | 0.821  | 0.754  | 0.923  | 0.983 | 1.233 |
| 139 | 6342105 | 0.513  | 0.484  | 0.929  | 1.509 | 1.043 | 0.622  | 0.643  | 0.904  | 1.341 | 1.043 |
| 140 | 6335465 | 0.871  | 0.868  | 0.945  | 0.915 | 1.084 | 0.819  | 0.851  | 0.908  | 0.919 | 1.084 |
| 141 | 6335697 | 0.918  | 0.895  | 0.963  | 0.940 | 1.077 | 0.675  | 0.628  | 0.839  | 0.673 | 1.077 |

|     |         |        |        |       |       |       |         |        |       |       |       |
|-----|---------|--------|--------|-------|-------|-------|---------|--------|-------|-------|-------|
| 142 | 6335610 | -0.386 | 0.281  | 0.732 | 1.655 | 1.128 | -0.707  | 0.063  | 0.777 | 1.897 | 1.158 |
| 143 | 6342060 | 0.812  | 0.825  | 0.905 | 0.863 | 1.052 | 0.624   | 0.808  | 0.815 | 1.011 | 1.052 |
| 144 | 6335010 | 0.938  | 0.886  | 0.972 | 0.894 | 0.969 | 0.867   | 0.823  | 0.937 | 0.838 | 0.969 |
| 145 | 6337350 | 0.903  | 0.856  | 0.955 | 0.864 | 0.982 | 0.585   | 0.794  | 0.811 | 1.079 | 0.983 |
| 146 | 6340330 | 0.766  | 0.771  | 0.923 | 0.894 | 0.812 | 0.714   | 0.716  | 0.870 | 0.831 | 0.812 |
| 147 | 6340225 | -1.133 | -0.213 | 0.853 | 2.203 | 0.938 | -1.085  | -0.126 | 0.796 | 2.107 | 1.014 |
| 148 | 6337600 | 0.923  | 0.902  | 0.969 | 0.985 | 0.909 | 0.824   | 0.825  | 0.912 | 0.881 | 0.908 |
| 149 | 6335651 | 0.537  | 0.628  | 0.882 | 1.344 | 0.924 | 0.442   | 0.663  | 0.813 | 1.270 | 0.924 |
| 150 | 6335640 | -0.024 | 0.255  | 0.921 | 1.649 | 1.357 | 0.275   | 0.353  | 0.892 | 1.529 | 1.357 |
| 151 | 6337320 | 0.920  | 0.945  | 0.960 | 0.975 | 0.972 | 0.842   | 0.905  | 0.927 | 1.053 | 0.972 |
| 152 | 6342820 | 0.930  | 0.916  | 0.971 | 1.069 | 1.038 | 0.811   | 0.878  | 0.902 | 0.937 | 1.038 |
| 153 | 6340400 | 0.694  | 0.765  | 0.895 | 1.186 | 0.902 | 0.583   | 0.718  | 0.773 | 0.865 | 0.902 |
| 154 | 6335730 | 0.905  | 0.911  | 0.957 | 0.976 | 1.074 | 0.701   | 0.796  | 0.881 | 1.148 | 1.074 |
| 155 | 6335820 | 0.771  | 0.696  | 0.960 | 1.230 | 1.194 | 0.692   | 0.678  | 0.910 | 1.240 | 1.195 |
| 156 | 6342081 | 0.044  | 0.399  | 0.916 | 1.326 | 1.498 | 0.392   | 0.444  | 0.859 | 1.199 | 1.499 |
| 157 | 6335175 | 0.028  | 0.199  | 0.934 | 1.770 | 1.210 | 0.042   | 0.246  | 0.899 | 1.717 | 1.209 |
| 158 | 6335035 | 0.814  | 0.812  | 0.905 | 0.838 | 0.994 | 0.403   | 0.509  | 0.636 | 0.670 | 0.995 |
| 159 | 6338260 | -0.863 | -0.249 | 0.935 | 2.247 | 0.961 | -0.379  | 0.195  | 0.783 | 1.774 | 0.959 |
| 160 | 6335676 | 0.857  | 0.843  | 0.952 | 1.047 | 1.141 | 0.627   | 0.641  | 0.800 | 0.738 | 1.142 |
| 161 | 6335700 | -3.456 | -0.483 | 0.862 | 1.887 | 2.181 | -1.554  | -0.472 | 0.749 | 1.839 | 2.183 |
| 162 | 6335680 | 0.889  | 0.753  | 0.966 | 0.756 | 0.990 | 0.790   | 0.715  | 0.906 | 0.731 | 0.991 |
| 163 | 6357510 | 0.700  | 0.765  | 0.864 | 0.885 | 0.847 | 0.480   | 0.488  | 0.709 | 0.607 | 0.847 |
| 164 | 6335830 | -0.740 | -0.046 | 0.836 | 2.033 | 1.034 | -0.839  | -0.063 | 0.819 | 2.047 | 1.032 |
| 165 | 6335550 | 0.441  | 0.612  | 0.845 | 0.777 | 0.723 | 0.333   | 0.632  | 0.777 | 1.095 | 0.724 |
| 166 | 6340340 | 0.747  | 0.604  | 0.915 | 0.616 | 0.954 | 0.632   | 0.510  | 0.860 | 0.532 | 0.955 |
| 167 | 6335620 | 0.900  | 0.838  | 0.962 | 1.016 | 1.157 | 0.841   | 0.807  | 0.921 | 0.922 | 1.157 |
| 168 | 6342810 | 0.418  | 0.575  | 0.906 | 1.142 | 1.389 | -0.102  | 0.331  | 0.776 | 1.496 | 1.390 |
| 169 | 6337330 | 0.891  | 0.857  | 0.948 | 0.870 | 0.972 | 0.823   | 0.853  | 0.908 | 0.889 | 0.972 |
| 170 | 6342525 | 0.774  | 0.762  | 0.938 | 1.134 | 1.187 | 0.738   | 0.776  | 0.890 | 1.056 | 1.187 |
| 171 | 6335635 | 0.917  | 0.931  | 0.958 | 0.945 | 0.998 | 0.674   | 0.655  | 0.832 | 0.698 | 0.999 |
| 172 | 6335720 | 0.896  | 0.831  | 0.955 | 0.848 | 1.058 | 0.789   | 0.856  | 0.890 | 0.926 | 1.057 |
| 173 | 6342660 | 0.797  | 0.874  | 0.910 | 1.088 | 1.007 | 0.716   | 0.786  | 0.846 | 0.851 | 1.008 |
| 174 | 6335696 | 0.854  | 0.832  | 0.928 | 0.848 | 0.993 | 0.738   | 0.870  | 0.872 | 1.021 | 0.994 |
| 175 | 6335155 | -1.910 | -0.279 | 0.896 | 2.177 | 1.490 | -3.707  | -0.717 | 0.729 | 2.623 | 1.490 |
| 176 | 6335671 | 0.834  | 0.795  | 0.949 | 1.138 | 1.143 | 0.417   | 0.562  | 0.849 | 1.386 | 1.143 |
| 177 | 6342050 | 0.380  | 0.425  | 0.834 | 0.581 | 0.643 | 0.432   | 0.369  | 0.769 | 0.534 | 0.643 |
| 178 | 6342125 | 0.229  | 0.381  | 0.931 | 1.580 | 1.205 | 0.588   | 0.724  | 0.822 | 1.047 | 1.206 |
| 179 | 6342571 | -0.162 | 0.491  | 0.574 | 1.256 | 1.107 | -0.455  | 0.347  | 0.615 | 1.517 | 1.106 |
| 180 | 6335560 | 0.691  | 0.746  | 0.887 | 0.955 | 1.222 | 0.703   | 0.703  | 0.855 | 0.868 | 1.223 |
| 181 | 6335665 | 0.767  | 0.818  | 0.925 | 0.932 | 0.848 | 0.593   | 0.690  | 0.788 | 0.833 | 0.849 |
| 182 | 6335725 | 0.881  | 0.839  | 0.944 | 0.851 | 1.026 | 0.801   | 0.817  | 0.896 | 0.852 | 1.026 |
| 183 | 6337590 | 0.799  | 0.625  | 0.961 | 0.811 | 1.321 | 0.800   | 0.618  | 0.921 | 0.811 | 1.322 |
| 184 | 6335677 | 0.884  | 0.784  | 0.955 | 0.792 | 0.964 | 0.649   | 0.579  | 0.836 | 0.614 | 0.964 |
| 185 | 6342960 | 0.863  | 0.862  | 0.946 | 1.127 | 0.989 | 0.706   | 0.852  | 0.852 | 0.994 | 0.990 |
| 186 | 6335485 | -0.041 | 0.306  | 0.891 | 1.595 | 1.339 | 0.038   | 0.372  | 0.800 | 1.489 | 1.339 |
| 187 | 6335156 | 0.812  | 0.740  | 0.952 | 1.145 | 1.211 | 0.765   | 0.766  | 0.896 | 1.002 | 1.210 |
| 188 | 6335735 | 0.921  | 0.851  | 0.975 | 0.923 | 1.125 | 0.810   | 0.787  | 0.906 | 0.857 | 1.126 |
| 189 | 6337503 | 0.557  | 0.767  | 0.815 | 1.136 | 0.962 | -0.284  | 0.447  | 0.563 | 1.338 | 0.961 |
| 190 | 6343537 | 0.569  | 0.685  | 0.918 | 1.199 | 1.230 | 0.546   | 0.629  | 0.863 | 1.257 | 1.230 |
| 191 | 6335165 | -0.127 | 0.194  | 0.934 | 1.729 | 1.337 | 0.007   | 0.289  | 0.866 | 1.612 | 1.337 |
| 192 | 6340216 | -0.755 | 0.075  | 0.927 | 1.632 | 1.672 | -0.028  | 0.242  | 0.828 | 1.309 | 1.671 |
| 193 | 6337580 | 0.910  | 0.865  | 0.958 | 0.873 | 0.985 | 0.807   | 0.784  | 0.904 | 0.807 | 0.985 |
| 194 | 6335570 | 0.818  | 0.853  | 0.912 | 0.903 | 0.933 | 0.742   | 0.853  | 0.871 | 0.979 | 0.932 |
| 195 | 6342945 | 0.635  | 0.805  | 0.849 | 1.027 | 1.120 | 0.570   | 0.764  | 0.799 | 1.032 | 1.120 |
| 196 | 6343120 | 0.547  | 0.633  | 0.887 | 1.027 | 1.348 | 0.511   | 0.578  | 0.834 | 1.174 | 1.347 |
| 197 | 6343520 | 0.722  | 0.817  | 0.902 | 1.059 | 1.143 | 0.638   | 0.777  | 0.834 | 1.044 | 1.142 |
| 198 | 6342540 | -0.031 | 0.439  | 0.818 | 1.352 | 1.397 | 0.306   | 0.504  | 0.755 | 1.169 | 1.397 |
| 199 | 6342940 | -7.264 | -1.095 | 0.607 | 3.034 | 1.311 | -15.740 | -2.599 | 0.661 | 4.569 | 1.311 |
| 200 | 6337300 | 0.900  | 0.831  | 0.964 | 0.903 | 1.134 | 0.846   | 0.799  | 0.930 | 0.870 | 1.136 |
| 201 | 6342947 | 0.778  | 0.845  | 0.904 | 0.981 | 1.120 | 0.679   | 0.748  | 0.828 | 0.861 | 1.121 |

Table 2: 200 sets of random multi-basin draws used for multi-basin calibrations.

| basin 1 | basin 2 | basin 3 | basin 4 | basin 5 | basin 6 |         |
|---------|---------|---------|---------|---------|---------|---------|
| N01     | 6336930 | 6338140 | 6337502 | 6340360 | 6335725 | 6335116 |
| N02     | 6335083 | 6342070 | 6338800 | 6335510 | 6337505 | 6335303 |
| N03     | 6335602 | 6335310 | 6338161 | 6335450 | 6335676 | 6342081 |
| N04     | 6338130 | 6337580 | 6337410 | 6335720 | 6335075 | 6335650 |
| N05     | 6335710 | 6340220 | 6335610 | 6335650 | 6342525 | 6335190 |
| N06     | 6335650 | 6336510 | 6338140 | 6341500 | 6335800 | 6335830 |
| N07     | 6335660 | 6340315 | 6335460 | 6335665 | 6340335 | 6335730 |
| N08     | 6342571 | 6337501 | 6335700 | 6340216 | 6335820 | 6335800 |
| N09     | 6335603 | 6335602 | 6337518 | 6335470 | 6337517 | 6338800 |
| N10     | 6337509 | 6337503 | 6335450 | 6335697 | 6335696 | 6357510 |

|     |         |         |         |         |         |         |
|-----|---------|---------|---------|---------|---------|---------|
| N11 | 6335560 | 6337509 | 6335830 | 6338250 | 6342970 | 6338100 |
| N12 | 6335710 | 6340218 | 6335351 | 6337310 | 6335010 | 6335290 |
| N13 | 6337502 | 6335697 | 6335167 | 6335570 | 6337250 | 6342130 |
| N14 | 6337310 | 6337100 | 6335696 | 6337500 | 6336930 | 6335620 |
| N15 | 6335175 | 6335565 | 6337310 | 6335155 | 6337500 | 6337504 |
| N16 | 6342820 | 6335621 | 6337510 | 6337550 | 6335117 | 6335620 |
| N17 | 6340366 | 6335360 | 6342105 | 6335160 | 6342120 | 6337512 |
| N18 | 6337510 | 6335310 | 6335510 | 6335155 | 6338140 | 6338161 |
| N19 | 6337508 | 6342081 | 6335156 | 6335696 | 6335725 | 6335570 |
| N20 | 6335117 | 6337520 | 6335032 | 6338800 | 6335075 | 6335301 |
| N21 | 6337502 | 6335032 | 6342980 | 6337550 | 6337511 | 6342070 |
| N22 | 6337514 | 6338160 | 6357510 | 6337500 | 6340350 | 6335125 |
| N23 | 6337518 | 6337513 | 6342060 | 6338110 | 6337503 | 6338161 |
| N24 | 6340350 | 6338250 | 6340335 | 6335810 | 6335116 | 6342960 |
| N25 | 6342120 | 6335302 | 6340320 | 6335031 | 6335600 | 6338130 |
| N26 | 6335820 | 6340810 | 6335603 | 6335465 | 6337610 | 6335031 |
| N27 | 6335560 | 6335485 | 6335160 | 6335640 | 6335676 | 6335700 |
| N28 | 6337501 | 6335677 | 6337506 | 6335820 | 6342050 | 6335810 |
| N29 | 6337330 | 6335621 | 6342980 | 6342960 | 6335500 | 6337500 |
| N30 | 6340200 | 6335635 | 6335031 | 6337400 | 6337512 | 6336930 |
| N31 | 6338161 | 6340360 | 6340366 | 6340220 | 6335117 | 6337511 |
| N32 | 6335720 | 6335125 | 6340350 | 6337601 | 6337505 | 6335485 |
| N33 | 6335603 | 6335697 | 6335360 | 6335303 | 6338140 | 6342522 |
| N34 | 6338161 | 6335290 | 6335681 | 6342105 | 6337410 | 6335510 |
| N35 | 6335160 | 6342655 | 6338140 | 6337519 | 6342120 | 6338163 |
| N36 | 6337506 | 6342105 | 6335310 | 6335290 | 6335035 | 6342810 |
| N37 | 6335635 | 6335700 | 6335303 | 6338100 | 6337514 | 6340210 |
| N38 | 6335190 | 6337518 | 6335820 | 6335167 | 6335530 | 6340440 |
| N39 | 6337541 | 6335510 | 6335010 | 6342571 | 6338140 | 6335450 |
| N40 | 6342520 | 6335601 | 6335540 | 6335660 | 6337530 | 6335116 |
| N41 | 6337320 | 6336930 | 6335696 | 6335600 | 6335620 | 6335032 |
| N42 | 6335117 | 6335302 | 6337340 | 6335500 | 6340220 | 6342100 |
| N43 | 6342521 | 6335302 | 6340220 | 6337560 | 6335570 | 6337350 |
| N44 | 6335540 | 6335035 | 6337501 | 6335350 | 6337512 | 6335650 |
| N45 | 6335302 | 6337550 | 6335500 | 6338800 | 6342060 | 6335690 |
| N46 | 6337504 | 6335565 | 6335650 | 6340360 | 6337501 | 6337570 |
| N47 | 6340400 | 6340365 | 6335165 | 6335485 | 6335570 | 6335640 |
| N48 | 6335290 | 6342521 | 6335500 | 6335550 | 6338110 | 6337501 |
| N49 | 6343537 | 6340365 | 6337050 | 6335660 | 6335082 | 6335310 |
| N50 | 6342960 | 6335048 | 6335190 | 6337500 | 6340320 | 6335082 |
| N51 | 6335117 | 6335601 | 6335291 | 6335600 | 6337516 | 6335175 |
| N52 | 6337600 | 6337508 | 6337330 | 6335035 | 6336930 | 6342130 |
| N53 | 6335045 | 6335540 | 6337518 | 6338140 | 6335695 | 6335301 |
| N54 | 6335530 | 6335521 | 6335730 | 6335550 | 6335700 | 6335676 |
| N55 | 6335540 | 6335460 | 6335651 | 6335465 | 6335175 | 6335810 |
| N56 | 6335635 | 6335730 | 6340315 | 6337512 | 6342571 | 6342675 |
| N57 | 6335032 | 6335031 | 6335725 | 6335681 | 6335115 | 6335800 |
| N58 | 6340700 | 6335116 | 6335725 | 6342521 | 6335083 | 6340050 |
| N59 | 6335076 | 6338150 | 6335695 | 6335675 | 6340216 | 6335603 |
| N60 | 6335620 | 6337310 | 6335697 | 6335680 | 6342980 | 6337542 |
| N61 | 6340335 | 6335046 | 6335032 | 6335081 | 6357020 | 6338163 |
| N62 | 6342120 | 6335470 | 6340218 | 6337340 | 6335697 | 6335720 |
| N63 | 6335117 | 6338130 | 6338161 | 6335076 | 6335465 | 6337508 |
| N64 | 6335695 | 6335540 | 6335730 | 6335610 | 6337514 | 6337542 |
| N65 | 6342120 | 6338130 | 6340200 | 6335540 | 6335030 | 6335165 |
| N66 | 6338140 | 6335030 | 6338260 | 6335470 | 6340220 | 6342125 |
| N67 | 6337511 | 6340070 | 6337509 | 6337503 | 6342960 | 6335820 |
| N68 | 6342130 | 6340315 | 6340700 | 6335650 | 6342980 | 6338110 |
| N69 | 6340200 | 6342520 | 6337512 | 6335735 | 6337590 | 6335450 |
| N70 | 6335800 | 6335710 | 6335082 | 6335510 | 6337507 | 6342105 |
| N71 | 6335075 | 6335710 | 6336510 | 6335570 | 6335076 | 6340330 |
| N72 | 6335640 | 6335675 | 6335076 | 6337542 | 6342130 | 6338800 |
| N73 | 6335175 | 6335035 | 6337550 | 6337512 | 6335820 | 6338161 |
| N74 | 6337507 | 6337516 | 6337519 | 6340365 | 6337530 | 6337060 |
| N75 | 6342970 | 6340366 | 6338120 | 6340070 | 6335510 | 6340340 |
| N76 | 6335310 | 6335600 | 6335510 | 6337501 | 6335301 | 6335640 |
| N77 | 6335155 | 6342670 | 6335075 | 6337250 | 6342502 | 6342125 |
| N78 | 6335720 | 6335640 | 6338100 | 6337504 | 6335465 | 6340340 |
| N79 | 6335155 | 6335075 | 6335540 | 6335620 | 6335635 | 6342050 |
| N80 | 6338100 | 6335031 | 6335830 | 6342502 | 6335735 | 6335650 |
| N81 | 6335156 | 6335730 | 6335602 | 6335190 | 6340200 | 6340810 |
| N82 | 6340400 | 6342105 | 6336510 | 6337510 | 6342502 | 6337410 |
| N83 | 6335076 | 6337580 | 6335470 | 6337520 | 6335601 | 6337505 |
| N84 | 6340335 | 6338260 | 6335671 | 6342230 | 6335031 | 6335710 |
| N85 | 6337520 | 6335046 | 6337503 | 6335450 | 6342081 | 6338260 |
| N86 | 6342525 | 6335675 | 6340225 | 6335465 | 6340350 | 6335800 |

|      |         |         |         |         |         |         |
|------|---------|---------|---------|---------|---------|---------|
| N87  | 6337350 | 6341500 | 6337550 | 6335160 | 6340216 | 6342960 |
| N88  | 6335570 | 6335510 | 6335310 | 6335671 | 6335290 | 6335500 |
| N89  | 6337502 | 6335690 | 6335360 | 6335155 | 6342675 | 6342810 |
| N90  | 6337580 | 6338161 | 6336510 | 6335030 | 6335671 | 6340365 |
| N91  | 6335303 | 6335560 | 6335115 | 6335083 | 6335621 | 6335031 |
| N92  | 6335540 | 6335651 | 6335290 | 6342655 | 6335676 | 6357020 |
| N93  | 6335700 | 6335820 | 6342640 | 6335520 | 6342670 | 6340365 |
| N94  | 6335165 | 6335117 | 6335651 | 6340400 | 6335470 | 6340315 |
| N95  | 6337503 | 6340400 | 6335485 | 6337580 | 6335030 | 6338130 |
| N96  | 6335621 | 6335651 | 6338800 | 6338163 | 6335800 | 6337513 |
| N97  | 6338100 | 6335550 | 6335115 | 6335190 | 6335677 | 6337250 |
| N98  | 6335660 | 6342130 | 6342070 | 6335640 | 6340366 | 6335117 |
| N99  | 6357510 | 6342820 | 6342520 | 6335155 | 6342060 | 6342081 |
| N100 | 6335620 | 6337550 | 6335083 | 6337509 | 6335640 | 6337330 |
| N101 | 6342125 | 6337560 | 6335602 | 6342810 | 6337506 | 6335450 |
| N102 | 6335710 | 6341500 | 6335610 | 6340340 | 6335677 | 6342810 |
| N103 | 6335565 | 6335570 | 6337610 | 6335690 | 6335301 | 6335725 |
| N104 | 6335602 | 6335046 | 6342960 | 6335621 | 6335570 | 6335031 |
| N105 | 6340210 | 6338163 | 6335485 | 6340050 | 6335696 | 6335450 |
| N106 | 6335035 | 6338161 | 6342960 | 6337509 | 6335485 | 6335610 |
| N107 | 6335165 | 6335351 | 6337516 | 6335635 | 6335291 | 6335620 |
| N108 | 6335048 | 6342525 | 6338110 | 6340216 | 6337507 | 6335083 |
| N109 | 6335602 | 6342230 | 6337501 | 6335640 | 6335350 | 6335735 |
| N110 | 6335602 | 6342230 | 6340366 | 6337504 | 6337507 | 6335083 |
| N111 | 6337400 | 6335190 | 6357510 | 6335117 | 6335303 | 6342640 |
| N112 | 6337542 | 6342960 | 6342125 | 6335602 | 6335601 | 6336510 |
| N113 | 6337590 | 6335290 | 6340220 | 6335175 | 6337508 | 6336930 |
| N114 | 6335010 | 6335671 | 6335081 | 6337516 | 6338260 | 6342521 |
| N115 | 6338100 | 6335665 | 6335465 | 6335115 | 6342655 | 6335725 |
| N116 | 6335670 | 6335665 | 6342521 | 6342081 | 6335565 | 6342060 |
| N117 | 6337400 | 6335681 | 6337507 | 6335291 | 6337310 | 6335521 |
| N118 | 6337250 | 6337502 | 6335565 | 6335167 | 6335010 | 6342960 |
| N119 | 6335302 | 6335540 | 6335710 | 6341500 | 6337511 | 6337505 |
| N120 | 6335620 | 6337516 | 6335500 | 6337501 | 6335075 | 6342105 |
| N121 | 6340315 | 6335175 | 6337514 | 6340440 | 6335081 | 6335035 |
| N122 | 6337050 | 6337060 | 6342230 | 6337100 | 6337310 | 6342100 |
| N123 | 6340225 | 6337400 | 6342130 | 6342655 | 6335675 | 6340335 |
| N124 | 6337550 | 6337600 | 6342520 | 6337509 | 6335165 | 6335310 |
| N125 | 6335520 | 6335081 | 6335603 | 6335680 | 6335125 | 6342230 |
| N126 | 6335160 | 6338130 | 6342105 | 6337320 | 6341500 | 6340225 |
| N127 | 6342520 | 6337350 | 6335603 | 6335810 | 6338100 | 6337509 |
| N128 | 6337541 | 6337590 | 6335601 | 6335675 | 6343537 | 6335680 |
| N129 | 6337530 | 6335303 | 6335602 | 6335696 | 6337060 | 6337600 |
| N130 | 6335083 | 6337517 | 6341500 | 6337513 | 6342571 | 6335810 |
| N131 | 6335603 | 6335635 | 6342670 | 6335697 | 6337501 | 6338140 |
| N132 | 6335115 | 6337506 | 6337520 | 6335165 | 6335530 | 6337518 |
| N133 | 6335030 | 6335165 | 6357020 | 6335302 | 6335520 | 6340400 |
| N134 | 6337590 | 6335290 | 6342640 | 6335032 | 6335450 | 6335650 |
| N135 | 6335360 | 6340320 | 6342520 | 6335601 | 6357020 | 6337601 |
| N136 | 6340200 | 6338100 | 6340220 | 6337310 | 6335116 | 6342230 |
| N137 | 6337520 | 6335301 | 6335117 | 6335671 | 6335500 | 6337400 |
| N138 | 6335600 | 6335075 | 6335082 | 6335116 | 6338150 | 6342081 |
| N139 | 6342640 | 6335671 | 6336930 | 6338160 | 6337505 | 6340335 |
| N140 | 6357020 | 6335302 | 6342522 | 6335665 | 6338150 | 6340360 |
| N141 | 6335465 | 6338160 | 6342675 | 6337509 | 6340340 | 6335720 |
| N142 | 6340366 | 6335830 | 6337610 | 6337502 | 6335610 | 6338150 |
| N143 | 6335083 | 6337060 | 6342655 | 6335690 | 6335450 | 6335670 |
| N144 | 6337310 | 6335290 | 6335160 | 6335048 | 6335310 | 6337503 |
| N145 | 6337506 | 6335635 | 6342060 | 6343537 | 6340050 | 6335621 |
| N146 | 6335600 | 6338163 | 6335116 | 6335076 | 6335540 | 6335310 |
| N147 | 6337505 | 6337506 | 6335675 | 6335310 | 6337503 | 6341500 |
| N148 | 6340700 | 6342970 | 6335048 | 6337505 | 6335520 | 6338140 |
| N149 | 6342081 | 6340400 | 6342100 | 6335125 | 6335675 | 6336930 |
| N150 | 6335010 | 6340070 | 6335048 | 6337508 | 6335610 | 6335671 |
| N151 | 6335565 | 6337509 | 6335735 | 6338161 | 6338110 | 6335601 |
| N152 | 6342521 | 6335670 | 6338800 | 6335301 | 6335530 | 6335155 |
| N153 | 6342070 | 6335650 | 6337504 | 6335560 | 6335820 | 6337590 |
| N154 | 6337530 | 6335681 | 6337060 | 6335603 | 6335601 | 6338120 |
| N155 | 6342125 | 6340070 | 6335031 | 6335485 | 6335603 | 6335465 |
| N156 | 6335115 | 6335735 | 6335450 | 6340700 | 6335076 | 6340810 |
| N157 | 6335601 | 6335603 | 6335076 | 6335635 | 6335820 | 6335697 |
| N158 | 6335830 | 6335115 | 6342980 | 6335485 | 6337320 | 6337506 |
| N159 | 6337050 | 6336930 | 6335075 | 6340320 | 6342960 | 6342120 |
| N160 | 6337504 | 6340216 | 6335032 | 6337516 | 6342125 | 6335125 |
| N161 | 6335600 | 6335083 | 6335350 | 6335048 | 6338161 | 6335530 |
| N162 | 6335621 | 6335820 | 6335610 | 6342070 | 6335156 | 6342655 |

|      |         |         |         |         |         |         |
|------|---------|---------|---------|---------|---------|---------|
| N163 | 6335695 | 6338130 | 6338260 | 6342640 | 6335520 | 6342050 |
| N164 | 6335046 | 6335601 | 6342110 | 6337500 | 6335350 | 6335610 |
| N165 | 6335697 | 6337503 | 6335725 | 6337590 | 6340366 | 6337513 |
| N166 | 6337517 | 6335680 | 6340360 | 6340216 | 6342502 | 6357510 |
| N167 | 6337514 | 6343537 | 6335710 | 6342125 | 6337410 | 6335302 |
| N168 | 6335676 | 6335680 | 6342810 | 6335303 | 6342130 | 6337550 |
| N169 | 6335081 | 6335530 | 6336510 | 6335601 | 6337410 | 6342130 |
| N170 | 6342110 | 6335670 | 6335696 | 6340210 | 6335800 | 6337513 |
| N171 | 6337580 | 6337507 | 6335470 | 6335115 | 6335570 | 6335510 |
| N172 | 6337570 | 6337530 | 6337503 | 6342070 | 6343537 | 6335725 |
| N173 | 6342120 | 6337610 | 6342660 | 6335565 | 6343537 | 6340320 |
| N174 | 6335635 | 6335031 | 6340400 | 6335165 | 6337350 | 6335800 |
| N175 | 6335010 | 6335621 | 6335675 | 6340050 | 6335046 | 6340366 |
| N176 | 6340200 | 6335720 | 6342810 | 6342125 | 6340330 | 6335710 |
| N177 | 6342640 | 6342810 | 6337508 | 6337507 | 6337400 | 6335302 |
| N178 | 6342521 | 6340220 | 6335010 | 6342655 | 6337320 | 6337504 |
| N179 | 6337320 | 6342670 | 6338160 | 6338161 | 6337542 | 6342521 |
| N180 | 6342670 | 6335600 | 6337512 | 6342522 | 6335290 | 6335695 |
| N181 | 6335560 | 6335665 | 6340330 | 6337513 | 6335125 | 6335690 |
| N182 | 6335680 | 6337500 | 6335030 | 6337519 | 6342060 | 6337601 |
| N183 | 6357020 | 6335720 | 6335082 | 6338163 | 6342970 | 6337516 |
| N184 | 6340350 | 6337330 | 6337560 | 6340320 | 6337500 | 6335115 |
| N185 | 6357020 | 6338110 | 6337505 | 6338120 | 6338150 | 6337511 |
| N186 | 6335610 | 6335720 | 6335290 | 6337510 | 6335046 | 6335650 |
| N187 | 6340216 | 6335082 | 6342105 | 6335550 | 6335351 | 6337560 |
| N188 | 6335301 | 6342960 | 6337330 | 6335360 | 6335520 | 6335735 |
| N189 | 6337508 | 6335155 | 6337516 | 6337512 | 6337511 | 6342675 |
| N190 | 6340440 | 6337580 | 6335470 | 6336930 | 6338150 | 6342060 |
| N191 | 6340810 | 6342655 | 6335310 | 6342670 | 6337508 | 6342070 |
| N192 | 6335010 | 6342980 | 6335680 | 6335600 | 6335621 | 6335565 |
| N193 | 6335680 | 6342130 | 6337060 | 6338250 | 6343537 | 6335500 |
| N194 | 6335650 | 6337560 | 6335600 | 6335725 | 6342110 | 6335160 |
| N195 | 6338160 | 6335651 | 6337508 | 6338161 | 6340366 | 6337510 |
| N196 | 6337518 | 6335076 | 6340218 | 6338150 | 6335650 | 6335697 |
| N197 | 6342060 | 6337507 | 6335681 | 6337600 | 6335165 | 6335730 |
| N198 | 6335650 | 6335160 | 6340440 | 6357020 | 6335167 | 6340200 |
| N199 | 6343537 | 6342100 | 6338250 | 6342640 | 6337510 | 6338260 |
| N200 | 6335303 | 6338120 | 6337250 | 6338260 | 6337610 | 6335485 |
